1 **Systematic mapping of drug metabolism by the human gut microbiome**

2

3 Pranatchareeya Chankhamjon<sup>1</sup>, Bahar Javdan<sup>1</sup>, Jaime Lopez<sup>2</sup>, Raffaella Hull<sup>1</sup>,

4 Seema Chatterjee<sup>1</sup>, and Mohamed S. Donia<sup>1</sup>

5

6 <sup>1</sup>Department of Molecular Biology, Princeton University, Princeton, New Jersey, 08544,

7 USA

8 <sup>2</sup>Lewis-Sigler Institute for Integrative Genomics, Princeton University, Princeton, New

9 Jersey, 08544, USA

10

11 Correspondence: [donia@princeton.edu](mailto:donia@princeton.edu)

12

13

14

15

16

17

18

19

20

21

22

23

24

25 **ABSTRACT**

26           **The human gut microbiome harbors hundreds of bacterial species with**  
27 **diverse biochemical capabilities, making it one of nature’s highest density,**  
28 **highest diversity bioreactors. Several drugs have been previously shown to be**  
29 **directly metabolized by the gut microbiome, but the extent of this phenomenon**  
30 **has not been systematically explored. Here, we develop a systematic screen for**  
31 **mapping the ability of the complex human gut microbiome to biochemically**  
32 **transform small molecules (MDM-Screen), and apply it to a library of 575 clinically**  
33 **used oral drugs. We show that 13% of the analyzed drugs, spanning 28**  
34 **pharmacological classes, are metabolized by a single microbiome sample. In a**  
35 **proof-of-principle example, we show that microbiome-derived metabolism occurs**  
36 ***in vivo*, identify the genes responsible for it, and provide a possible link between**  
37 **its consequences and clinically observed features of drug bioavailability and**  
38 **toxicity. Our findings reveal a previously underappreciated role for the gut**  
39 **microbiome in drug metabolism, and provide a comprehensive framework for**  
40 **characterizing this important class of drug-microbiome interactions.**

41

42

43

44

45

46

47

## 48 INTRODUCTION

49 The oral route is the most common route for drug administration. Upon exiting  
50 the stomach, drugs can be absorbed in the small and/or large intestine to reach the  
51 systemic circulation and eventually the liver, or can be transported there directly via the  
52 portal vein. Once at the liver, drugs may be metabolized and secreted back (along with  
53 their metabolites) to the intestines through bile, via the enterohepatic circulation<sup>1,2</sup>. Even  
54 parenterally administered drugs and their resulting metabolites can reach the intestines  
55 through biliary secretion. Therefore, whether prior to or after absorption, most  
56 administered drugs will spend a considerable amount of time in the small and large  
57 intestines, where trillions of bacterial cells reside and form our human gut microbiome.  
58 Despite this fact, and the significant inter-individual variability in both the composition  
59 and function of the gut microbiome<sup>3</sup>, we know much less about how our microbiome  
60 interacts with drugs than about how our liver interacts with them.

61 Broadly speaking, there are two main types of interactions that can occur  
62 between drugs and the microbiome, which may result in significant effects on drug  
63 metabolism, bioavailability, efficacy, and toxicity: direct and indirect interactions.  
64 Examples of indirect interactions include the competition between microbiome-derived  
65 metabolites and administered drugs for the same host metabolizing enzymes<sup>4</sup>,  
66 microbiome effects on the immune system in anticancer immunotherapy<sup>5-7</sup>, microbiome  
67 reactivation of secreted inactive metabolites of the drug<sup>8</sup>, and microbiome overall effects  
68 on the levels of metabolizing enzymes in the liver and intestine<sup>9</sup>. Direct interactions  
69 between administered drugs and the microbiome include the partial or complete  
70 biochemical transformation of a drug into more or less active metabolites by

71 microbiome-derived enzymes (termed herein: Microbiome-Derived Metabolism, or  
72 MDM).

73         The human gut microbiome harbors hundreds of bacterial species, encoding an  
74 estimated 100 times more genes than the human genome<sup>10</sup>. This enormous diversity  
75 and richness of genes represent a repertoire of yet-uncharacterized biochemical  
76 activities capable of metabolizing ingested chemicals, including both dietary and  
77 therapeutic ones<sup>11</sup>. Although MDM has been observed for more than 50 years, and in  
78 dozens of examples, this process is still mostly overlooked in the drug development  
79 pipeline<sup>2,12-14</sup>. Moreover, studies investigating this process have focused mainly on one  
80 bacterium or one drug at a time, and no efforts have been spent to systematically  
81 assess the ability of the human gut microbiome to metabolize oral drugs or to develop  
82 tools for incorporating this type of analysis into the drug development pipeline. This is  
83 owed mainly to the enormous complexity of the microbiome, and to the overwhelming  
84 technical challenge of testing hundreds of drugs against thousands of cultured isolates  
85 under multiple conditions. Unlike liver-derived metabolism, the lack of a systematic,  
86 global, and standardized map of MDM has hindered our ability to reliably predict and  
87 eventually interfere with undesired microbiome effects on drug pharmacokinetics and/or  
88 pharmacodynamics.

89         To address this gap in knowledge, we here develop a systematic screen for  
90 mapping MDM (MDM-Screen, **Fig. 1**). Our screen relies on three main arms: i) an  
91 optimized batch culturing system for sustaining the growth of complex, personalized,  
92 human microbiome-derived microbial communities; ii) a high-throughput analytical  
93 chemistry platform for screening hundreds of clinically used small molecule drugs; and

94    iii) a defined mouse colonization assay for assessing the effect of the microbiome on the  
95    pharmacokinetics of selected drugs. Using MDM-Screen with 575 clinically used, orally  
96    administered, small molecule drugs, we discovered that 13% of them can be subject to  
97    MDM. As a proof-of-principle example, we selected one of these transformations –  
98    MDM deglycosylation of fluoropyrimidines – for further functional investigations. We  
99    identify microbiome-derived species and enzymes responsible for this transformation,  
100   show that it occurs *in vivo* in a microbiome-dependent manner, and provide evidence  
101   that its consequences may explain outcomes already observed in the clinic. Our screen  
102   described here, and the findings obtained from it represent the first systematic map of  
103   microbiome-derived metabolism of clinically used drugs, and provide a framework for  
104   incorporating an “MDM” module in future drug development pipelines.

105

106

107

108

109

110

111

112

113

114

115

116

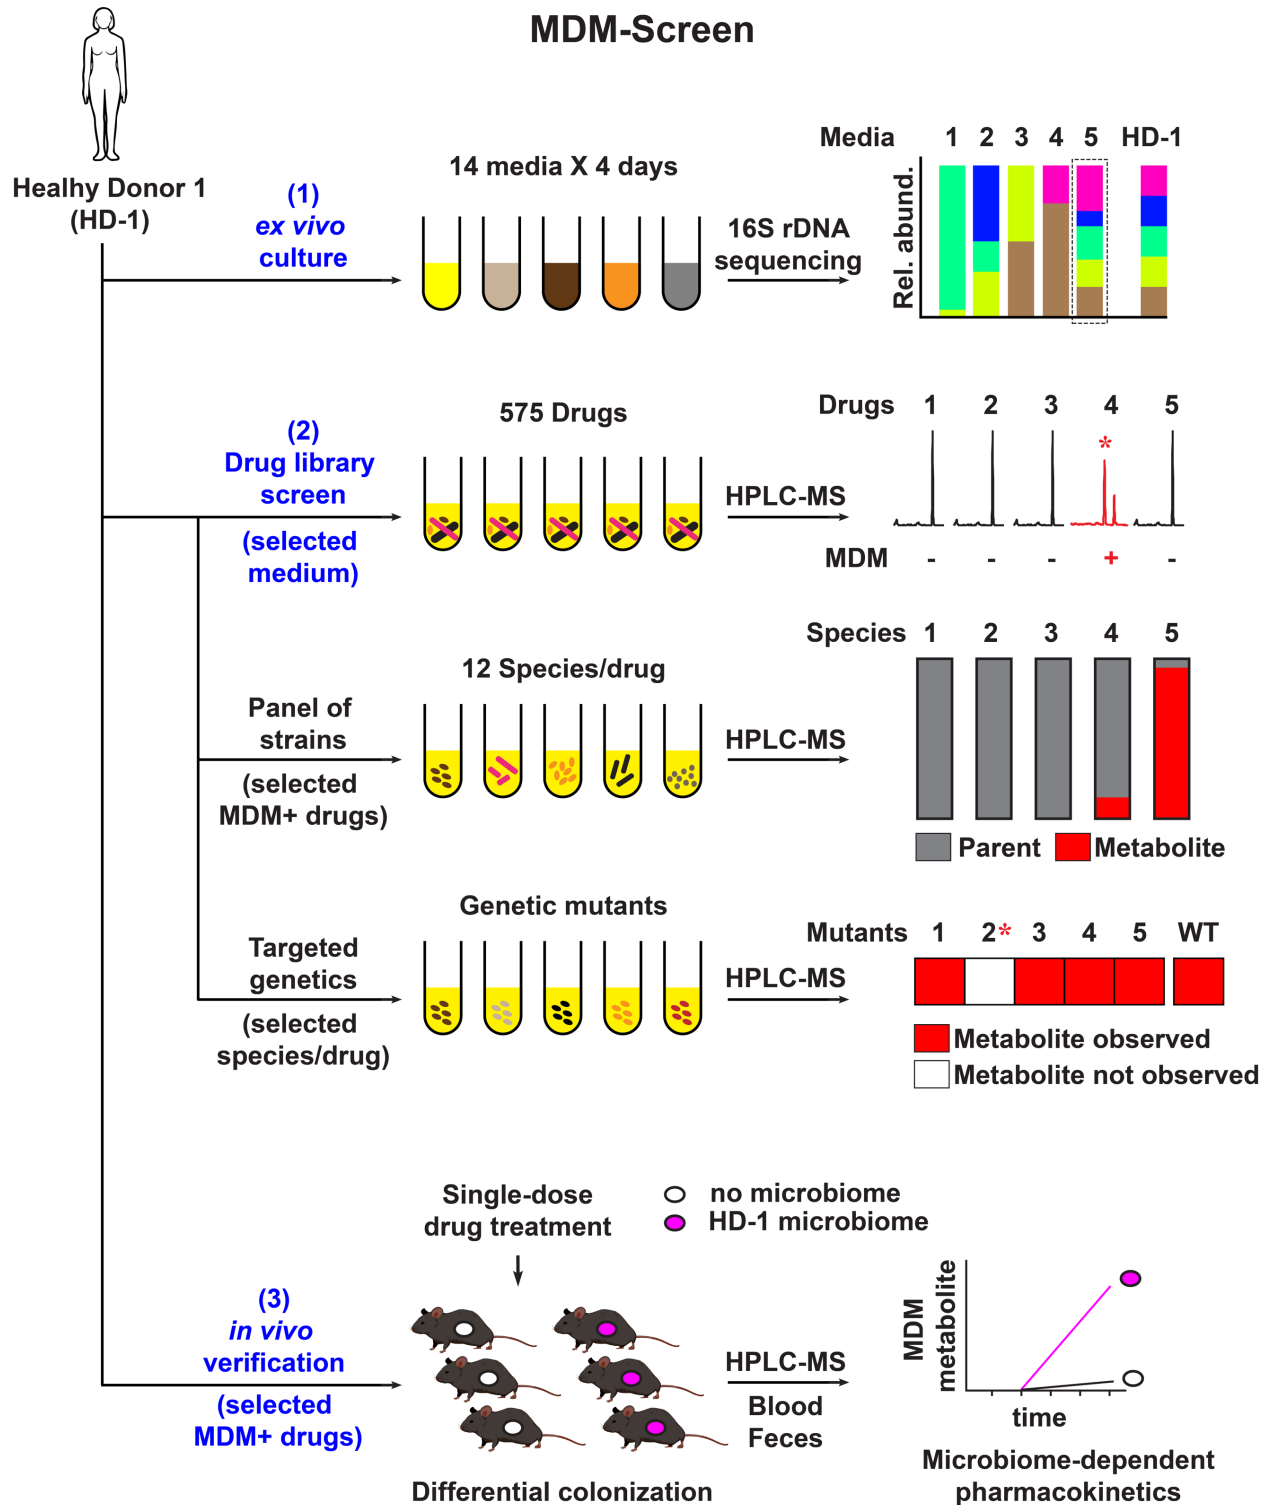

117

118

119

120           **Figure 1. General approach of MDM-Screen.** MDM-Screen is comprised of  
121 three arms. (1) An optimized *ex vivo* culturing model of the gut microbiome in batch  
122 format, where a fecal sample from a healthy donor (HD-1) is cultured in 14 different  
123 media for 4 days, and the best culturing condition is determined by high-throughput 16S  
124 rDNA amplicon sequencing. (2) A biochemical screen, where the ability of the cultured  
125 HD-1 microbiome to metabolize 575 drugs is determined using HPLC-MS. By screening  
126 a diverse set of gut isolates, the same platform is used to identify members of the  
127 microbiome that may be responsible for specific modifications. Finally, specific genes  
128 and enzymes responsible for the modifications are identified by targeted mutagenesis in  
129 selected species. (3) For selected MDM cases, a microbiome-dependent  
130 pharmacokinetic experiment is performed in mice to assess whether the same drug  
131 modification can be observed *in vivo*.

132

133

134

135

136

137

138

139

140

141

142

## 143 **RESULTS**

### 144 **An optimized *ex vivo* culturing model for the human gut microbiome**

145       A major challenge in studying the capacity of the human gut microbiome to  
146 metabolize orally administered drugs is the enormous diversity of the bacterial species  
147 involved: a typical gut microbiome sample harbors hundreds of species and thousands  
148 of strains, many of which are found only in a subset of healthy individuals<sup>3,15</sup>. It is  
149 therefore impractical to systematically screen thousands of isolated strains against  
150 hundreds of drugs, forcing previous studies to rely mainly on a selected set of  
151 representative species. Moreover, gene expression profiles and the significance of a  
152 given biochemical transformation may vary dramatically between a monocultured strain  
153 and one that is grown in a mixed community. To address these challenges, we sought  
154 to develop the first arm of MDM-Screen: an optimized *ex vivo* culturing system that a)  
155 supports the growth of a large proportion of the species from a given microbiome  
156 sample in a similar taxonomical composition, and b) is amenable to high-throughput  
157 biochemical screens.

158       Acknowledging the fact that a significant fraction of the community will inevitably  
159 evade cultivation efforts, we undertook a systematic approach to identify the medium  
160 and culturing period that can support the growth of the maximal number of species in a  
161 batch culture of a mixed community. Freshly collected human feces from a healthy  
162 donor (referred to as HD-1) were transferred to an anaerobic chamber, suspended in  
163 PBS with 0.1% cysteine, and stored in aliquots of dozens of glycerol stocks. We then  
164 started cultures (anaerobic, 37 °C) from glycerol-stocked HD-1 in 14 different media,  
165 and collected samples daily for 4 days. Finally, we extracted DNA from all cultures,



166 amplified the V4 region of the bacterial 16S rRNA gene, and deeply sequenced the  
167 amplicons using Illumina (100,000 sequences per sample, on average). From the  
168 sequencing results, amplicon sequence variants (ASVs) were inferred using DADA2  
169 plugin within QIIME2, and the final taxonomical composition at different levels was  
170 determined for each sample using a naive Bayes classifier trained on the Greengenes  
171 database<sup>16-19</sup>. We then quantified the differences between the various media and the  
172 original fecal sample at both the family level (using the Jensen-Shannon divergence  
173 ( $D_{JS}$ ), a metric that measures the similarity of two distributions), as well as at the single  
174 ASV level (to infer the recovery rate of species from the original sample).

175       Two main findings emerged from this analysis. First, as expected, we observed a  
176 great level of variation in both the taxonomical composition and diversity between the  
177 different media and culturing periods. Some media led to highly diverse communities  
178 that captured portions of the original fecal diversity, while others became dominated  
179 almost exclusively by a single family. Second, among the 14 media commonly used in  
180 cultivation efforts from the human microbiome<sup>20</sup>, we identified one medium, modified  
181 Gifu Anaerobic Medium (mGAM), that supported the growth of a bacterial community  
182 most similar in composition and diversity to the one observed in HD-1 (**Fig. 2a**,  
183 **Supplementary Fig. 1**). At the family level, mGAM cultures largely match the  
184 composition of HD-1, differing primarily in a commonly observed expansion of the  
185 facultative anaerobes, Enterobacteriaceae, at the expense of the obligate anaerobes,  
186 Ruminococcaceae. This is likely a result of the inevitable exposure to oxygen during  
187 sample handling until delivery to the anaerobic chamber (~ 30 min)<sup>21</sup>. Among all tested  
188 media, mGAM cultures showed the lowest  $D_{JS}$  divergence from HD-1, becoming

189 increasingly similar to the original sample as growth proceeds (see **Supplementary**  
190 **Fig. 1** for the entire four-day time course).

191 Even at the single ASV level, mGAM cultures capture much of the diversity in  
192 HD-1 (mGAM cultures have the highest Shannon diversity across all media, and the  
193 closest one to HD-1) (**Fig. 2b and Supplementary Fig. 2**). In the original fecal sample,  
194 there are 33 ASVs present above a relative abundance of 1%, 26 (79%) of which are  
195 present in mGAM day two culture. Overall, total shared ASVs between the original fecal  
196 sample and mGAM day two account for 70% of the HD-1 composition, indicating that  
197 the mGAM culture recapitulates the bulk of the original community. Taken together, and  
198 consistent with previous reports showing that mGAM can support the growth of a wide  
199 variety of gut microorganisms in monoculture<sup>20,22</sup>, our results establish mGAM day two  
200 cultures as a viable *ex vivo* batch culturing model for the human gut microbiome, where  
201 a significant portion of the taxonomical diversity from the original fecal sample can be  
202 captured and maintained in a similar composition.

203

204

205

206

207

208

209

210

211

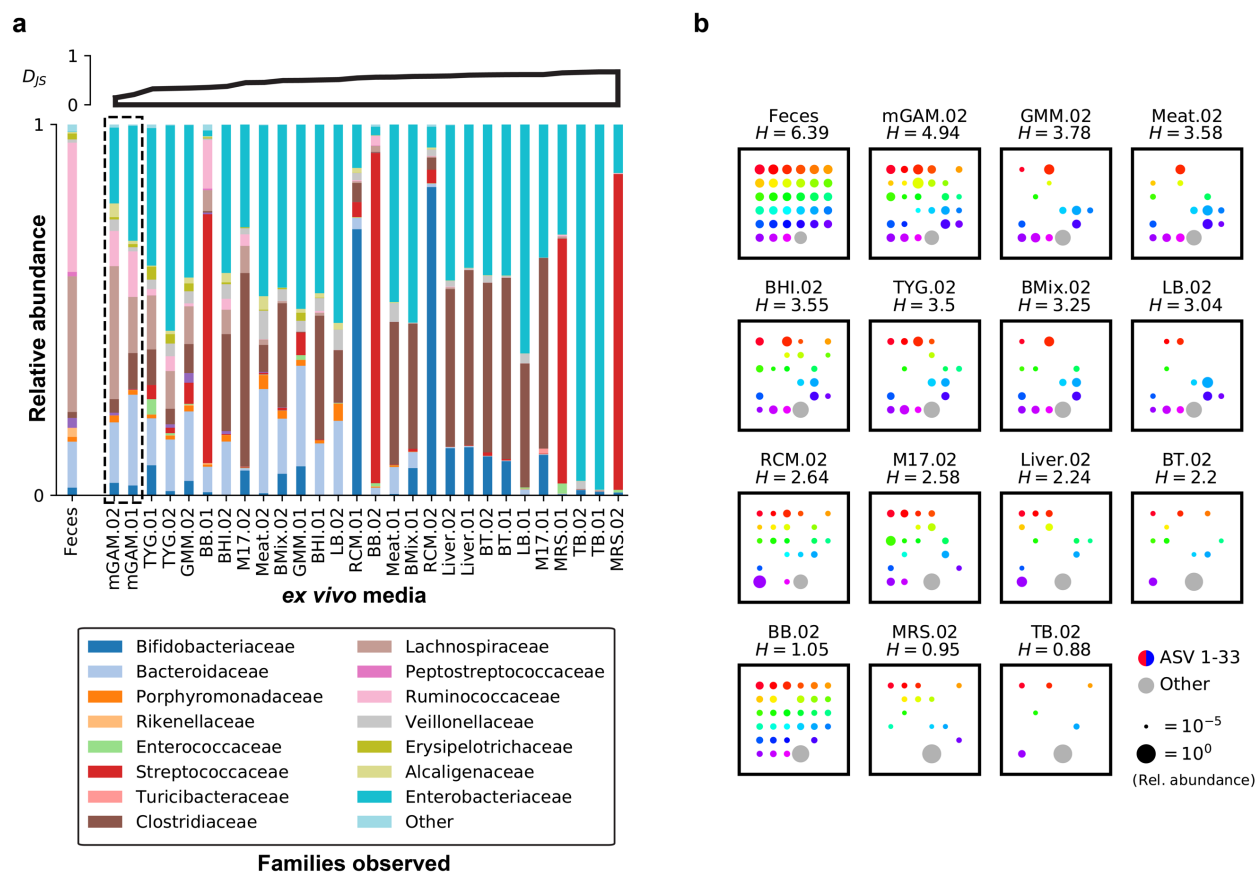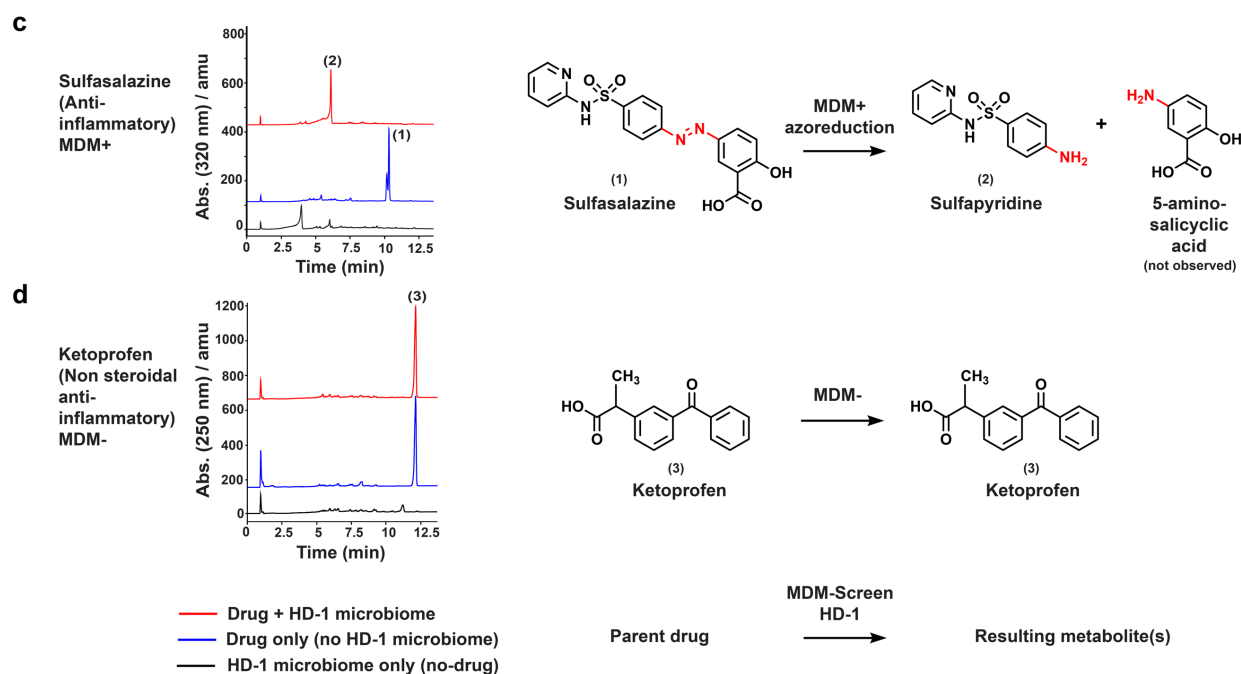

212

213

214           **Figure 2. Development of MDM-Screen. a)** Family level bacterial composition  
215 of the original HD-1 fecal sample (far left), as well as that of HD-1 *ex vivo* cultures  
216 grown anaerobically in 14 different media over two days (.01 and .02). Full names of the  
217 media used are listed in the **Methods**. A four-day time course of HD-1 in the same  
218 media is shown in **Supplementary Fig. 1**. 16S rRNA gene sequences that could not be  
219 classified at the family level, and families with less than 1% relative abundance in all  
220 samples are grouped into “Other”. Cultures are ordered according to their Jensen-  
221 Shannon  $D_{JS}$  divergence from the original HD-1 sample (upper axes, computed at the  
222 family level), where lower values indicate higher similarity to HD-1. Note that cultures  
223 grown in mGAM (mGAM.02 and mGAM.01) are the most similar to HD-1. **b)** Amplicon  
224 Sequence Variant (ASV) level bacterial composition of the original HD-1 fecal sample,  
225 and that of day two *ex vivo* cultures of HD-1 grown in 14 different media, where each  
226 square represents one sample. Rainbow colored dots represent the relative abundance  
227 of individual ASVs that are above 1% in HD-1, while grey dots represent the combined  
228 relative abundance of all ASVs below 1% in HD-1. A larger dot indicates a higher  
229 relative abundance, as indicated by a size scale at the bottom right corner. Samples are  
230 ordered by their Shannon diversity ( $H$ ) at the ASV level, computed in bits and shown  
231 above each square. Note that mGAM.02 culture has the highest Shannon diversity, and  
232 the closest to HD-1. **c)** HPLC-MS analysis of sulfasalazine (1) incubated with HD-1  
233 mGAM-02 culture (red) or with mGAM.02 broth (blue). A similar analysis is also done for  
234 HD-1 mGAM.02 culture with no drug added (black). An HPLC chromatogram at an  
235 absorbance of 320 nm is shown for all three samples, indicating the conversion of  
236 sulfasalazine (1) to sulfapyridine (2) in the presence of the HD-1 microbiome. This is a

237 typical case of an MDM+ drug. **d)** A similar HPLC-MS analysis for ketoprofen (3). An  
238 HPLC chromatogram at an absorbance of 250 nm is shown, indicating no modification  
239 to the parent drug in the presence of the HD-1 microbiome. This is a typical case of an  
240 MDM- drug.

241

242

243

244

245

246

247

248

249

250

251

252

253

254

255

256

257

258

259

## 260 **A high-throughput drug screen for MDM**

261 With an optimized *ex vivo* culturing system in hand, we developed the second  
262 arm of MDM-Screen: a combined biochemical / analytical chemistry approach for the  
263 systematic mapping of MDM. Our approach needed to fulfill the following criteria: a) is  
264 reproducible, and its reproducibility can be quickly assessed, b) is scalable to hundreds  
265 of drugs, c) is sensitive, even with a small amount of drug, and d) is feasible in a  
266 reasonable time frame and in an academic laboratory setting. After several iterations,  
267 we successfully devised a strategy that meets all four desired criteria (**Fig.1 and Fig.**  
268 **2b, 2c**). In this strategy, three samples are prepared per drug of interest: 1) a 3-ml, 24-  
269 hour mGAM *ex vivo* culture of the starting human feces, incubated with the drug of  
270 interest at a final concentration of 33  $\mu$ M (which is in line with estimates of drug  
271 concentrations in the gastrointestinal tract)<sup>23</sup>, 2) a similar culture incubated with the  
272 same volume of a vehicle control (DMSO), and 3) a 3-ml volume of sterile mGAM,  
273 incubated with the same drug concentration. The no-drug control is important to  
274 distinguish microbiome-derived small molecules from ones that result from MDM of the  
275 tested drug. The no-microbiome control is important to distinguish cases of passive drug  
276 degradation or faulty chemical extraction from those of active MDM. Cultures and  
277 controls are then incubated for an additional 24 hours at 37°C in an anaerobic chamber,  
278 chemically extracted, and finally analyzed using High Performance Liquid  
279 Chromatography coupled with Mass Spectrometry (HPLC-MS). The entire procedure is  
280 repeated three consecutive times to verify the reproducibility of the screen.

281 To evaluate the feasibility, reproducibility, and scalability of our screen, we  
282 performed a pilot experiment on a selected set of 6 orally administered drugs that are

283 diverse in structure and biological activities (erythromycin, antibiotic; terbinafine,  
284 antifungal; ketoprofen, antiinflammatory; valganciclovir, antiviral; topotecan, anticancer;  
285 atenolol, antihypertensive). Importantly, we also included a drug that is known to be  
286 readily metabolized by the human microbiome as a positive control: sulfasalazine, a  
287 prodrug that is intestinally activated by the human microbiome to produce the anti-  
288 inflammatory drug 5-aminosalicylic acid (5-ASA) and the metabolite sulfapyridine<sup>24,25</sup>.  
289 Unequivocally, we observed a reproducible metabolism of sulfasalazine into  
290 sulfapyridine, while the rest of the tested drugs remained unchanged in all three trials  
291 (**Fig. 2c, 2d**). These results establish our analytical screen as a valid method for  
292 determining the effect of MDM on orally administered drugs, where positive and  
293 negative results can be readily and reproducibly differentiated.

294 With these promising results from the pilot assay, we decided to apply MDM-  
295 Screen to a library of 575 orally administered drugs. This library is a subset of the  
296 SCREEN-WELL<sup>®</sup> FDA approved drug library (Enzo Life Sciences, Inc.), including only  
297 drugs with an established oral route of administration. We chose this library because of  
298 its diversity in chemical structure and pharmacological activity (**Supplementary Table**  
299 **1**); and although all of the drugs in this library are currently being used in the clinic,  
300 almost nothing is known about their metabolism by the human gut microbiome.  
301 Following the procedures established in the pilot screen, we tested each drug twice,  
302 along with matching no-drug and no-microbiome controls. For final verification and  
303 consensus determination, a third trial was performed for drugs that showed a positive  
304 MDM on either or both of the first two trials. Therefore, a drug is deemed MDM+ when it  
305 is metabolized in the same manner during at least two out of three independent

306 experiments. Taken together, we have developed and performed a high-throughput  
307 screen for mapping the ability of the complex human microbiome to metabolize orally  
308 administered small molecule drugs, in a systematic and unbiased manner.

309

### 310 **MDM-Screen identifies novel drug-microbiome interactions**

311 Among the 575 drugs tested, 438 (76%) of them were successfully analyzed  
312 using our aforementioned procedures; the remaining 137 failed MDM-Screen due to  
313 issues related to drug stability or incompatibilities with the extraction or chromatography  
314 methods employed (see **Discussion**). Among the successfully analyzed drugs, 57  
315 (13%) were identified as MDM-Positive (MDM+) (**Supplementary Table 1,**  
316 **Supplementary Table 2, and Supplementary Fig. 3**). As expected, several previously  
317 reported MDM cases were identified, further verifying MDM-Screen as a systematic  
318 method for discovering microbiome-drug interactions. These include the nitroreduction  
319 of the muscle relaxant dantrolene<sup>26</sup>, nitroreduction of the antiepileptic clonazepam  
320 (reported only in rats before this study)<sup>27</sup>, hydrolysis of the isoxazole moiety in the  
321 antipsychotic risperidone<sup>28,29</sup>, as well as several modifications to the bile acids  
322 chenodeoxycholic acid and ursodiol<sup>30</sup>.

323 More importantly, MDM-Screen identified a suite of novel MDM cases (46 cases,  
324 80% of the MDM+ drugs). Among those, we selected four examples for detailed  
325 characterization: the commonly used anti-hypertensive / cardiac drug nicardipine, the  
326 chemotherapeutic agent capecitabine, and finally, the two steroidal anti-inflammatory  
327 drugs hydrocortisone (cortisol) and hydrocortisone acetate (often administered rectally),  
328 which produce an identical MDM metabolite. To unequivocally determine the structure



329 of the resulting metabolite for each of these cases, we scaled up the biochemical  
330 incubation with HD-1, isolated and purified each of the resulting metabolites, and  
331 elucidated their structures using Nuclear Magnetic Resonance (NMR) (**see Methods**  
332 **and Supplementary Data 1**). Nicardipine metabolite (aminonicardipine) corresponds to  
333 the nitroreduced form of the drug: a common modification by members of the gut  
334 microbiome but one that has not been reported for this drug (**Fig. 3a**). For  
335 hydrocortisone, we determined that MDM results in the reduction of the ketone group at  
336 C20, producing 20-dihydrocortisone (**Fig. 3b**). For hydrocortisone acetate, the same  
337 modification occurs but is accompanied with deacetylation of the C21 hydroxyl group  
338 (**Supplementary Fig. 3**). While C20 reduction was previously reported for  
339 hydrocortisone<sup>31,32</sup>, neither deacetylation nor C20 reduction were reported for  
340 hydrocortisone acetate. For capecitabine, we show that MDM results in complete  
341 deglycosylation, again, a modification never reported for this drug (**Fig. 3c**). Taken  
342 together, these results establish MDM-Screen as a viable method for identifying both  
343 known and novel biochemical modifications of structurally and pharmacologically  
344 diverse drugs by the gut microbiome.

345

346

347

348

349

350

351

352

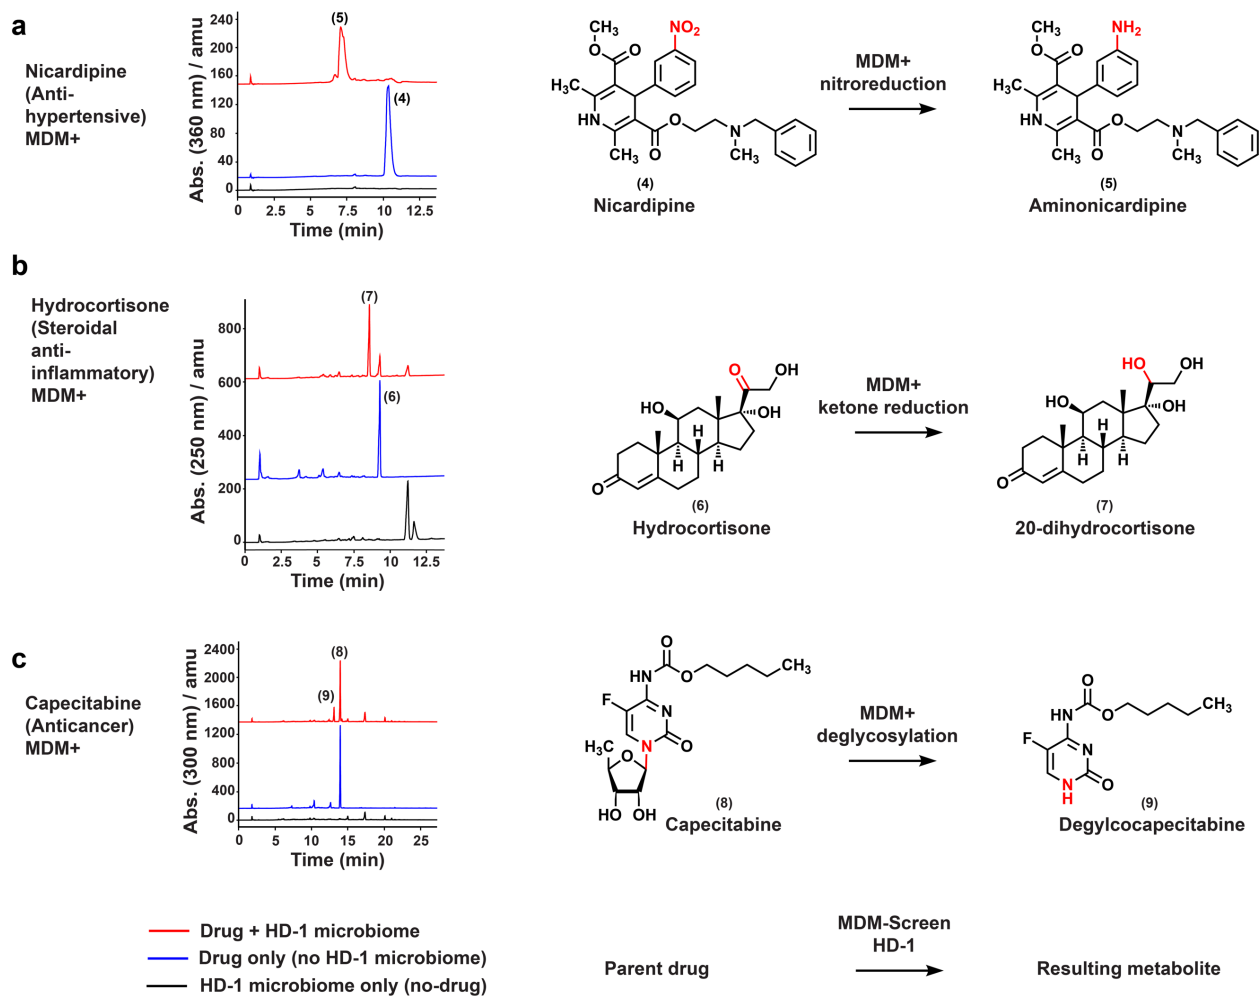

353

354

355

356

357

358

359

360

361

362

363           **Figure 3. Examples of positive hits from MDM-Screen.** An HPLC-MS analysis  
364 is shown for each of the selected examples, where three chromatograms are displayed  
365 per case: one for the drug incubated with HD-1 mGAM.02 culture (red), a second one  
366 for the drug incubated with mGAM.02 broth (blue), and a third one for HD-1 mGAM.02  
367 culture with no drug added (black). **a)** An HPLC chromatogram at an absorbance of 360  
368 nm is shown for nicardipine (4), indicating its conversion to aminonicardipine (5) in the  
369 presence of the HD-1 microbiome. **b)** An HPLC chromatogram at an absorbance of 250  
370 nm is shown for hydrocortisone (6), indicating its conversion to 20-dihydrocortisone (7)  
371 in the presence of the HD-1 microbiome. **c)** An HPLC chromatogram at an absorbance  
372 of 300 nm is shown for capecitabine (8), indicating its conversion to  
373 deglycocapecitabine (9) in the presence of the HD-1 microbiome. Structures of the three  
374 metabolites were elucidated using NMR (**see Supplementary Data 1**).

375

376

377

378

379

380

381

382

383

384

385

## 386 **A global analysis of MDM by HD-1**

387 Other than discovering novel drug-microbiome interactions, the results of our  
388 systematic screen allow for an unbiased, global analysis of MDM. Overall, the 57 MDM+  
389 drugs belonged to 28 pharmacological classes and an even more diverse set of  
390 structural classes (**Fig. 4a and Supplementary Table 2**). We hypothesized that  
391 members of the microbiome would be more likely to metabolize natural or naturally-  
392 derived compounds due to a higher probability of prior exposure. To test this  
393 hypothesis, we first annotated each of the MDM+ or MDM- drugs to one of three  
394 categories: naturally occurring molecules (i.e., molecules directly derived from humans,  
395 plants, or microbes; an example of this category is hydrocortisone; N=30), derivatives of  
396 naturally occurring molecules (i.e., a semisynthetic derivative or a close structural mimic  
397 of a natural product, an example of this category is hydrocortisone acetate; N=90), and  
398 synthetic molecules (an example of this category is nicardipine; N=318). Interestingly,  
399 by comparing the fraction of MDM+ drugs in the first two categories (natural +  
400 derivative, 26 out of 120, 21.6%) to that of the third category (synthetic, 31 out of 318,  
401 10%), we revealed a significant difference ( $p < 0.001$ , two-tailed proportions z-test).  
402 Intrigued, we decided to examine differences in MDM at lower levels of drug  
403 classification. We observed a significantly higher hit rate among steroids (steroids: 14  
404 out of 26, 53.8%; non-steroid: 43 out of 412, 10.4%,  $p < 0.001$ , two-tailed proportions z-  
405 test), including hormonal steroids, corticosteroids, bile acids, and derivatives thereof. In  
406 fact, the high hit rate of the steroid class is the major contributor to the observed  
407 difference between the hit rates of natural/derivative and synthetic groups, which is  
408 abolished upon exclusion of the steroids (non-steroid natural/derivative: 12 out of 96,

409 12.5%; non-steroid synthetic: 31 out of 316, 10%). The high hit rate among steroids is  
410 in-line with the idea that the microbiome is more likely to metabolize compounds it  
411 frequently encounters, as steroids (e.g., bile acids) are normally present in the gut, and  
412 at high concentrations<sup>33</sup>. The fact that ~10% of fully synthetic molecules are  
413 metabolized by HD-1 indicates the presence of a yet-unexplored range of biochemical  
414 activities that are encoded by the gut microbiome, and are capable of recognizing  
415 foreign substrates.

416

### 417 **Linking MDM to specific members of the human microbiome**

418 Our results from MDM-Screen indicate a significant and diverse ability of the  
419 collective gut microbiome to metabolize clinically used drugs that are unrelated in  
420 structure and biological activity. Next, we wondered whether the observed biochemical  
421 modifications can be attributed to specific members of the microbiome. To answer this  
422 question, we picked the same representative set of MDM transformations that we  
423 characterized above (3 transformations on 3 drugs) (**Fig. 3**), and explored the ability of  
424 a limited panel of 11 gut microbiome isolates and a laboratory strain to perform them.  
425 This panel was selected from three of the most abundant Phyla that normally inhabit the  
426 gut microbiome (Firmicutes, Bacteroidetes, and Proteobacteria), and spans 10 bacterial  
427 genera. Overall, nitroreduction of nicardipine was extensively performed by  
428 Bacteroidetes and Firmicutes, while capecitabine deglycosylation was mainly performed  
429 by Proteobacteria and one of the two tested Bacteroidetes: *Parabacteroides distasonis*.  
430 (**Fig. 4b**). None of the tested strains performed C20 reduction of hydrocortisone,  
431 suggesting that it is performed by a yet unidentified member(s) of the HD-1 microbiome

432 (only two gut isolates were previously shown to perform C20 reduction on  
433 hydrocortisone: *Clostridium scindens* and *Butyricicoccus desmolans*)<sup>31,32</sup>.

434         Interestingly, we also observed sequential MDM transformations that appear to  
435 be contributed by different members of the microbiome on the same parent drug. An  
436 example of this includes the deacetylation (ester hydrolysis) and further reduction of  
437 hydrocortisone acetate. When hydrocortisone acetate (10) is incubated with either *P.*  
438 *distasonis* or *Clostridium bolteae*, it is deacetylated to yield hydrocortisone. When  
439 incubated with HD-1, however, it is both deacetylated and further reduced to yield 20-  
440 dihydrocortisone (**Fig. 4c and Supplementary Fig. 4**). Since we determined that a yet-  
441 unidentified member of the HD-1 microbiome is able to reduce hydrocortisone (6) at  
442 C20 (**Fig. 3 and Fig. 4b**), a two-step metabolic sequence is likely at play here, where  
443 hydrocortisone acetate (10) is first deacetylated to yield hydrocortisone (6) by  
444 *Parabacteroides* or *Clostridium* sp. in HD-1, then ketone reduced at C20 by another  
445 member of the microbiome to yield 20-dihydrocortisone (7). Overall, these results  
446 highlight the utility of our approach in mapping the ability of the complex human  
447 microbiome to metabolize drugs, whether it is contributed by one or several members of  
448 the microbiome: a key advance over experiments that are based on a single isolate.

449

450

451

452

453

454

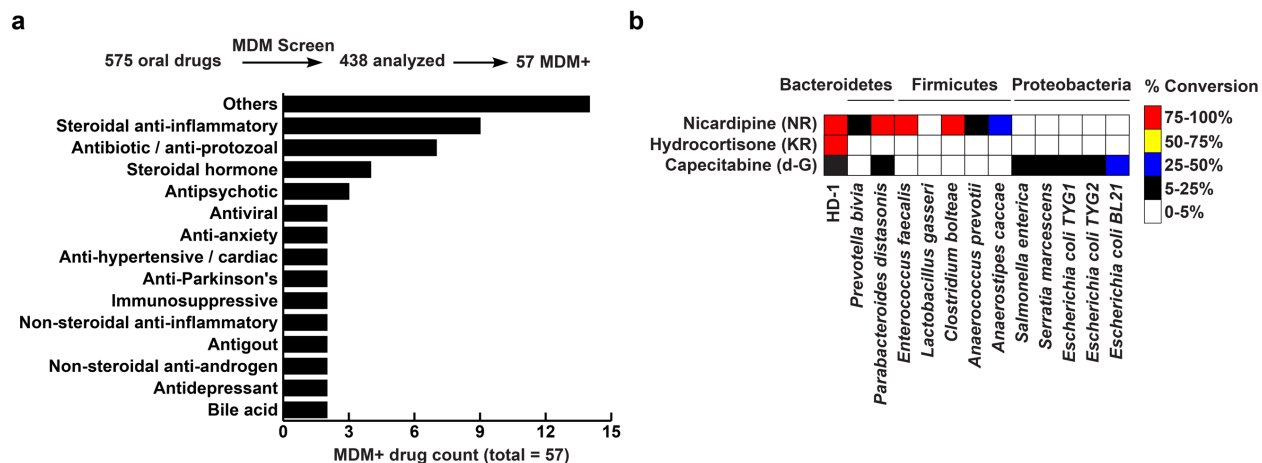

**c**

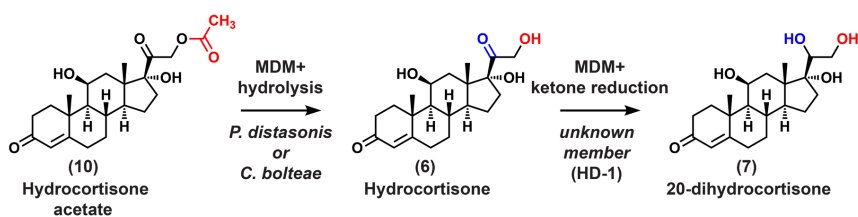

455

456

457

458

459

460

461

462

463

464

465

466

467

468

469           **Figure 4. Overall results of MDM-Screen. a)** A bar graph showing the  
470 pharmacological classes of MDM+ drugs discovered by MDM-Screen. “Others” include  
471 one drug each from 14 additional classes (**Supplementary Table 1**). In the inset bar  
472 graph, “natural”, “derivative”, or “synthetic” indicate whether the tested drug is: a natural  
473 product of any source (human, plant, microbial), a derivative of a naturally occurring  
474 molecule, or fully synthetic, respectively. \*\*\* indicates  $p < 0.001$ , two-tailed proportions  
475 z-test. **b)** A heat map indicating the ability of each of 12 tested strains to perform the  
476 three example modifications in **Fig. 3**: NR, nitroreduction; KR, ketone reduction; and d-  
477 G, deglycosylation. **c)** An example of sequential metabolism revealed by MDM-Screen:  
478 hydrocortisone acetate (10) can be first deacetylated by two members of the  
479 microbiome (*P. distasonis* and *C. bolteae*) to yield hydrocortisone (6), which is then  
480 reduced at C20 by a yet-unidentified member of the HD-1 microbiome to yield 20-  
481 dihydrocortisone (7). Structures were confirmed by NMR and comparison to authentic  
482 standards (**Supplementary Data 1 and Supplementary Fig. 4**).

483

484

485

486

487

488

489

490

491



## 492 **An MDM case study: capecitabine**

493 Our ability to map MDM in a systematic manner is only the first step towards  
494 understanding the mechanistic details and biological consequences of direct drug-  
495 microbiome interactions. Therefore, we selected one MDM example, deglycosylation of  
496 capecitabine, for follow-up studies. Five main reasons motivated us to choose this  
497 modification for additional studies. First, the modification exerted on capecitabine yields  
498 a novel metabolite (deglycocapecitabine) that has not been previously reported in  
499 humans or animals, potentially providing more insights into the complex  
500 pharmacokinetics of this drug. Second, capecitabine is one of several generations of  
501 antimetabolite chemotherapeutic agents, many of which are prodrugs for 5-fluorouracil  
502 (5-FU), and are known collectively as the oral fluoropyrimidines (FPs)<sup>34,35</sup>. Because  
503 these agents share the same overall structure (a glycosylated and fluorinated  
504 pyrimidine), they may be subject to the same MDM. Third, oral FPs' bioavailability and  
505 toxicity vary widely among patients<sup>36,37</sup>, but the human gut microbiome's contribution to  
506 this variability has not been explored. Fourth, a related transformation was previously  
507 reported for another pyrimidine analog, the antiviral sorivudine, and linked to toxic  
508 outcomes during co-administration with 5-FU, suggesting the potential yet unexplored  
509 importance of deglycosylation for a wide range of drugs<sup>38</sup>. Finally, as shown above,  
510 capecitabine MDM is performed mainly by proteobacterial members of the microbiome,  
511 as well as some members of the Bacteroidetes. This feature not only provides  
512 genetically tractable organisms for functional studies (e.g., *E. coli*), but may also result  
513 in MDM variability between individuals depending on the relative abundance of specific  
514 metabolizers.

## 515 **Genetic basis of MDM deglycosylation**

516 To gain more insights into the molecular mechanism of MDM deglycosylation, we  
517 sought to identify microbiome-derived enzymes responsible for this transformation. In  
518 humans, thymidine phosphorylase (TP) and uridine phosphorylase (UP), both part of  
519 the pyrimidine salvage pathway, were shown to catalyze the required deglycosylation of  
520 5'-deoxy-5-fluorouridine at the last step of capecitabine metabolism to yield 5-FU<sup>39</sup>. To  
521 test whether bacterial homologs of human TP and/or UP are responsible for the  
522 observed MDM deglycosylation of capecitabine, we generated strains of *E. coli*  
523 BW25113 that are knockouts for TP ( $\Delta deoA$ ), UP ( $\Delta udp$ ), or both, and compared their  
524 ability to metabolize capecitabine to that of wild type *E. coli* (**Fig. 5a**). While wild type *E.*  
525 *coli* efficiently deglycosylates capecitabine (~30% conversion rate), the deglycosylating  
526 activity of  $\Delta udp$  and the  $\Delta deoA/\Delta udp$  knockout strains is significantly diminished (less  
527 than 4% conversion rate,  $p$ -value <0.001, two-tailed t-test) (**Fig. 5b**). Surprisingly, the  
528  $\Delta deoA$  knockout strain showed a significant increase in its deglycosylating activity in  
529 comparison to the wild type (~ 50% conversion rate,  $p$ -value <0.01, two-tailed t-test),  
530 possibly due to a compensating mechanism (e.g., overexpression of *udp*) in the  
531 absence of *deoA*. These results indicate that microbiome-derived UP is, at least in part,  
532 responsible for the intestinal deglycosylation of capecitabine.

533

## 534 **MDM deglycosylation is widespread in the fluoropyrimidine class of** 535 **chemotherapeutic agents**

536 Next, we wondered whether deglycosylation occurs with other FPs, and whether  
537 the same enzymes are involved. To answer this question, we investigated the MDM of

538 two additional oral FPs (doxifluridine and trifluridine), using both WT and mutant *E. coli*.  
539 We found that both drugs were subject to the same MDM deglycosylation, indicating  
540 that this modification is widespread among this class of molecules. Interestingly, unlike  
541 with capecitabine, almost complete deglycosylation was observed with WT *E. coli* (there  
542 was hardly any parent molecule left after 24 hours), and the activity was dependent on  
543 both TP and UP, as it was abolished only in the  $\Delta deoA/\Delta udp$  knockout (**Supplementary**  
544 **Fig. 5 and Supplementary Fig. 6**). These results indicate a level of deglycosylation  
545 specificity for TP/UP amongst the FPs, likely due to how well each drug mimics their  
546 natural substrate. Remarkably, the consequences of the same modification may be very  
547 different depending on the structural features of the tested drug. In the case of  
548 trifluridine, the resulting metabolite (trifluorothymine) is inactive (**Fig. 5d and**  
549 **Supplementary Fig. 5**): trifluridine needs to be incorporated intact into DNA to cause  
550 cytotoxicity<sup>40</sup>. Such a premature intestinal inactivation by the microbiome may thus be  
551 an unknown contributor to the established low bioavailability of trifluridine, in addition to  
552 the known contribution of human TP<sup>36</sup>. In the case of doxifluridine, however, the  
553 resulting metabolite is the active 5-FU itself (**Fig. 5e and Supplementary Fig. 6**). This  
554 premature activation of the prodrug may therefore lead into gastrointestinal toxicity –  
555 again, a side effect commonly associated with oral doxifluridine<sup>41,42</sup>.

556 To shed light on the potential consequences of capecitabine MDM  
557 deglycosylation, we sought to interrogate whether its metabolite, deglycocapecitabine,  
558 is able to re-enter the normal capecitabine metabolism cycle and yield 5-FU. In the liver,  
559 capecitabine is metabolized by liver carboxyesterases to yield 5'-deoxy-5-fluorocytidine,  
560 which is then deaminated by cytidine deaminase to yield 5'-deoxy-5-fluorouridine

561 (doxifluridine). Preferentially in tumor tissues (due to the higher expression level of its  
562 metabolizing enzymes), doxifluridine is deglycosylated by human TP/UP to yield the  
563 active 5-FU (**Supplementary Fig. 7**)<sup>43</sup>. Similarly, deglycocapecitabine would almost  
564 certainly need to be processed by liver carboxyesterases to yield 5-fluorocytidine. Thus,  
565 we decided to directly test the activity of human carboxyesterase 1 (CES1) – the most  
566 important carboxyesterase in capecitabine metabolism – against  
567 deglycocapecitabine<sup>44,45</sup>. Notably, while CES1 efficiently removed the carbamate group  
568 from capecitabine to yield 5'-deoxy-5-fluorocytidine *in vitro*, deglycocapecitabine was  
569 not recognized as a substrate by the enzyme under the same conditions  
570 (**Supplementary Fig. 7**). These results suggest that capecitabine MDM deglycosylation  
571 results in an inactivated product that is unlikely to yield the active 5-FU. Taken together,  
572 our findings indicate that FP deglycosylation is a common yet understudied MDM  
573 transformation that may have diverse consequences on the pharmacokinetics and/or  
574 pharmacodynamics of this widely used class of chemotherapeutic agents.

575

576

577

578

579

580

581

582

583

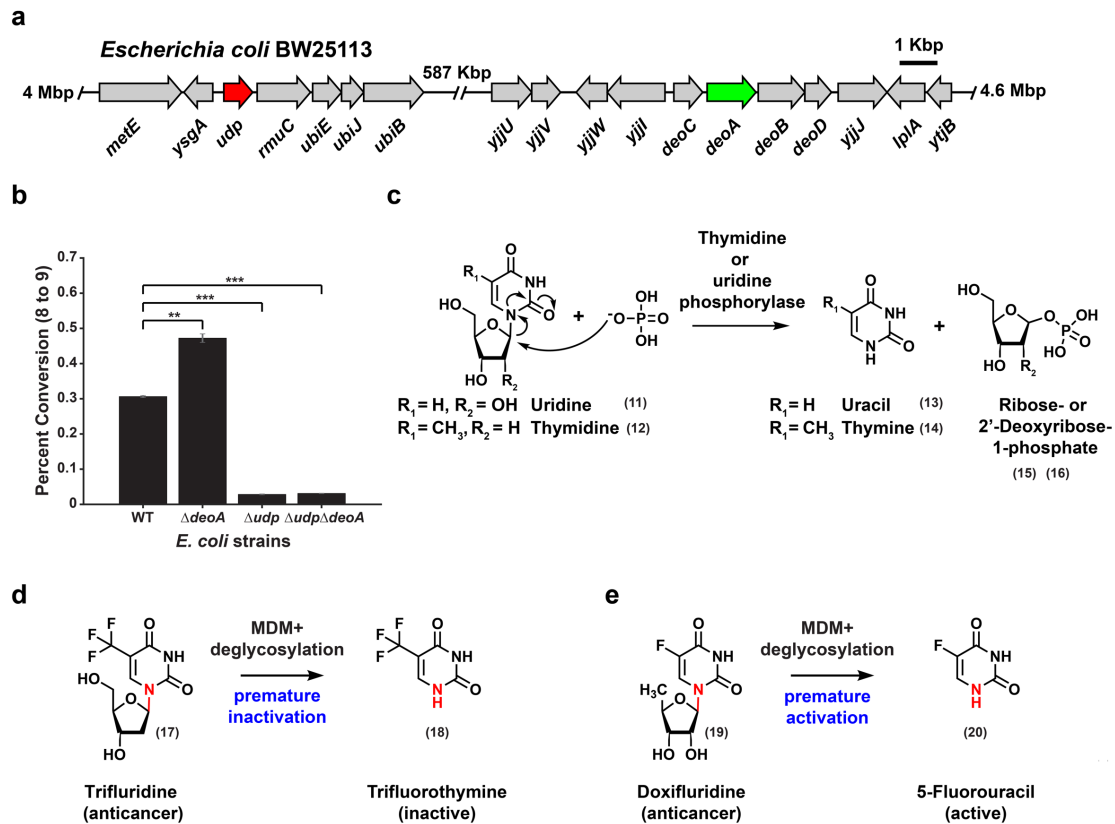

584

585

586

587

588

589

590

591

592

593

594

595

596 **Figure 5. Genetic basis and widespread nature of MDM deglycosylation**  
597 **among the FPs. a)** Genetic organization of the *udp* and *deoA* loci in the genome of *E.*  
598 *coli* BW25113. **b)** A bar graph indicating percent conversion of capecitabine (8) to  
599 deglycocapecitabine (9) by wild type *E. coli* BW25113 (WT), and  $\Delta udp$ ,  $\Delta deoA$ , and  
600  $\Delta deoA/\Delta udp$  mutants (each tested in triplicate). \*\*\* indicates *p*-value <0.001, while \*\*  
601 indicates *p*-value <0.01, two-tailed t-test. Error bars represent the standard deviation. **c)**  
602 Biochemical reaction catalyzed by thymidine and uridine phosphorylases on their  
603 natural substrates. **d)** MDM deglycosylation of the oral anticancer drug trifluridine (17)  
604 leads to its premature inactivation, since trifluorothymine (18) is no longer active. **e)**  
605 MDM deglycosylation of the anticancer prodrug doxifluridine (19) leads to its premature  
606 activation, since 5-fluorouracil (20) is the intended active metabolite. MDM  
607 deglycosylation of trifluridine and doxifluridine is also dependent on *deoA* and *udp*, and  
608 the structures of all resulting metabolites were confirmed by comparison to authentic  
609 standards (**Supplementary Fig. 5 and Supplementary Fig. 6**).

610

611

612

613

614

615

616

617

618

619 **MDM deglycosylation occurs *in vivo***

620           Although MDM-Screen was able to uncover novel microbiome-drug interactions,  
621 including MDM deglycosylation of FPs, it is unclear whether these results (observed *ex*  
622 *vivo*) can be recapitulated within a host (*in vivo*). To address this question, we selected  
623 MDM deglycosylation of capecitabine as a proxy for other FPs, and monitored it in an *in*  
624 *vivo* pharmacokinetic study that is performed in a microbiome-dependent manner. We  
625 treated two groups of C57/B6 mice with a cocktail of antibiotics for 14 days, then  
626 colonized one group with HD-1 while the control group remained non-colonized. The  
627 two groups were then treated with a single human-equivalent oral dose of capecitabine  
628 (755 mg/kg), and blood and feces were collected from each mouse at times 0, 20, 40,  
629 60, 120 and 240 minutes post drug administration (**Fig. 6a**). Finally, we quantified  
630 capecitabine and its metabolites in chemical extracts from blood and feces using HR-  
631 HPLC-MS. Remarkably, deglycocapecitabine was detected in fecal samples from  
632 animals colonized with HD-1 as early as 20 min after dosing, and was almost  
633 completely absent in non-colonized ones (**Fig. 6b**). To our surprise, with the single dose  
634 regimen provided here, we could not detect deglycocapecitabine in mouse blood  
635 samples. In contrast, capecitabine, and its major liver-derived metabolite (5'-deoxy-5-  
636 fluorocytidine) were readily detected in blood with no significant differences between the  
637 two groups (**Supplementary Fig. 8**). These results indicate that – at least in the case of  
638 FP deglycosylation – MDM transformations observed *ex vivo* by MDM-Screen are  
639 recapitulated *in vivo*.

640

641

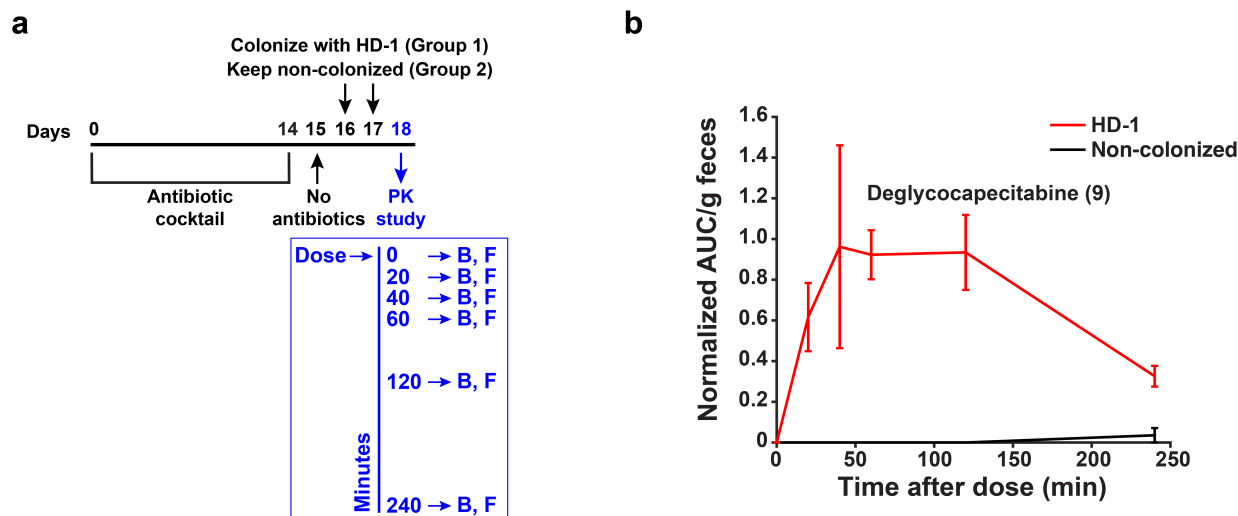

642

643

644 **Figure 6. MDM deglycosylation occurs *in vivo*.** a) Design of a microbiome-  
645 dependent pharmacokinetic experiment performed in mice using capecitabine. Mice are  
646 treated with antibiotics for 14 days, then colonized with HD-1 (N=6) or left non-colonized  
647 (N=6). On the pharmacokinetic experiment day, a single human-equivalent dose is  
648 administered to mice using oral gavage, and serial sampling of blood (B) and feces (F)  
649 is performed at 0, 20, 40, 60, 120, and 240 minutes post dosing. b) HR-HPLC-MS  
650 based quantification of deglycocapecitabine in fecal samples from mice colonized with  
651 HD-1 in comparison to non-colonized ones (see also **Supplementary Fig. 8**).  
652 Metabolite Area Under the Curve (AUC) per gram of feces is normalized by the AUC of  
653 an internal standard (voriconazole) (**see Methods**). Error bars represent the standard  
654 error of the mean.

655

656

657

658



659

## 660 **DISCUSSION**

661           In the current study, we develop a systematic screen for assessing the ability of  
662 the human gut microbiome to directly metabolize orally administered drugs, using a  
663 combination of microbial community cultivation, a high-throughput drug screen, bacterial  
664 genetics, and defined mouse colonization assays. Several key differences set our  
665 approach apart from previous studies in this area. First, instead of relying on single  
666 isolates in performing the initial screen, we use a well-characterized patient-derived  
667 microbial community that mimics to a large extent the original sample in composition  
668 and diversity. Despite the technical challenges associated with characterizing and  
669 maintaining stable microbial communities in batch cultures, three main advantages  
670 make this strategy worth pursuing: i) the extent of a biochemical transformation  
671 performed by single isolates cultured individually may be completely different than that  
672 performed by the same isolates when cultured as part of a complex community; ii) the  
673 net result of several members of the microbiome acting on the same drug can only be  
674 identified in mixed communities and not in single-isolate experiments, unless all  
675 pairwise and higher order permutations are tested; and iii) our strategy is  
676 “personalizable”. Some of the results obtained here – including the extent and type of  
677 certain modifications – will likely be specific to the strain-level composition of the HD-1  
678 microbiome, and may vary if the assay is repeated with samples from different subjects.  
679 MDM-Screen has thus a good potential for assessing inter-patient variability in MDM.

680           Second, while most previous studies have focused on certain drug / species  
681 combinations that have historically been deemed important, our screen is agnostic

682 towards the modifications being detected, the drugs being screened, and the  
683 responsible members of the microbiome being identified. This unbiased, systematic  
684 approach allowed us to map for the first time the potential extent of MDM, and to  
685 discover drug-microbiome interactions never reported before. We provide these results  
686 as a resource for the scientific community to further study the mechanistic details and  
687 pharmacological consequences of these newly discovered interactions. Third, MDM-  
688 Screen is performed in an efficient, high-throughput manner for both the organisms (a  
689 complex microbial community mimicking the original microbiome sample), and the drugs  
690 tested (almost 600 drugs were tested in an academic lab setting). With additional  
691 optimizations on the cultivation side (e.g., the use of 96-well plates) and the analytical  
692 chemistry side (e.g., automation of the extraction procedures), one can easily expand  
693 the screen to hundreds of human microbiome samples and thousands of drugs.

694         Despite these advances, our approach is still subject to several limitations. First,  
695 24% of the drugs tested failed to be analyzed using the general analytical chemistry  
696 workflow described in the initial MDM-Screen. These drugs fell into one or more of three  
697 main categories: were not stable after overnight incubation in no-microbiome controls,  
698 could not be extracted using ethyl acetate, or could not be analyzed using reverse  
699 phase chromatography, with the last two being attributed mostly to polar or charged  
700 compounds. An alternative chemical analysis method will need to be developed for  
701 these molecules in order to assess their MDM. Second, we focused initially on oral  
702 drugs, yet several parenteral drugs and their liver-derived metabolites may be subject to  
703 important MDM transformations after biliary secretion. Third, even in our most diverse  
704 *ex vivo* cultures, we fail to support the growth of 100% of the community in the original

705 sample. Finally, we initially based our analysis on a single human sample, HD-1.  
706 Therefore, it is almost certain that the types of MDM transformations observed here are  
707 an underestimation of all possible ones, and that performing MDM-Screen several times  
708 with samples derived from unrelated subjects may be necessary to reveal the complete  
709 biochemical potential of MDM.

710         Although MDM was shown to lead into changes in the bioavailability, toxicity,  
711 and/or efficacy of certain therapeutics (e.g., digoxin) – to the same extent as liver  
712 metabolism – it is almost entirely overlooked by the regulatory agencies when  
713 developing new drugs<sup>14,46</sup>. Our current study was designed to achieve two main goals:  
714 a) develop a simple platform for studying MDM in a systematic manner; b) map the  
715 extent of MDM against commonly used drugs, including the functional characterization  
716 of key proof-of-principle examples. By achieving these goals, our overall findings reveal  
717 an unexpectedly large and diverse ability of the human microbiome to directly  
718 metabolize clinically used, small molecule drugs, and a wide potential for MDM as a key  
719 factor in explaining the observed inter-patient variability in the pharmacokinetics and/or  
720 pharmacodynamics of these agents. At the same time, our approach provides the  
721 regulatory agencies (e.g., the Food and Drug Administration) with a simple screen for  
722 assessing MDM that can be easily implemented in any typical drug development  
723 pipeline. It is crucial that drug-microbiome interactions, including both effects of drugs  
724 on the microbiome (which were systematically mapped in an elegant screen published  
725 recently)<sup>23</sup>, as well as MDM (mapped here for the first time) are considered while  
726 studying the pharmacology and toxicology of newly developed therapeutic agents.  
727

728

## 729 **METHODS**

730

### 731 ***ex vivo* culture of human gut microbiome communities**

732         The Institutional Review Board (IRB) at Princeton University determined that the  
733 activity was not human subjects research. Consequently, Princeton IRB approval was  
734 not applicable. Freshly collected human fecal material from a healthy donor, HD-1 (~ 30  
735 min from collection, transported on ice) was brought into an anaerobic chamber (70%  
736 N<sub>2</sub>, 25% CO<sub>2</sub>, 5% H<sub>2</sub>). One gram of the sample was suspended in 15 ml of sterile  
737 phosphate buffer (PBSc) supplemented with 0.1% L-cysteine in a 50 ml sterile falcon  
738 tube. The suspension was left standing still for 5 min to let insoluble particles settle. The  
739 supernatant was mixed with an equal volume of 40% glycerol in PBSc. Aliquots (1 ml) of  
740 this suspension were placed in sterile cryogenic vials and frozen at -80 °C until use<sup>47</sup>.

741         A small aliquot (~20 µl) from an HD-1 glycerol stock was used to inoculate 10 ml  
742 of 14 different media: Liver Broth (Liver), Brewer Thioglycolate Medium (BT), Bryant and  
743 Burkey Medium (BB), Cooked Meat Broth (Meat), Thioglycolate Broth (TB), Luria-  
744 Bertani Broth (LB) (obtained from Sigma Aldrich, USA), Brain Heart Infusion (BHI), MRS  
745 (MRS), Reinforced Clostridium Medium (RCM), M17 (M17) (obtained from Becton  
746 Dickinson, USA), modified Gifu Anaerobic Medium (mGAM) (obtained HyServe,  
747 Germany), Gut Microbiota Medium (GMM<sup>47</sup>), TYG, and a 1:1 mix of each (BestMix), and  
748 cultures were incubated at 37 °C in an anaerobic chamber. One ml was harvested from  
749 each culture each day for 4 consecutive days, and centrifuged to recover the resulting  
750 bacterial pellets. DNA was extracted from all pellets using the Power Soil DNA Isolation

751 kit (Mo Bio Laboratories, USA), the 16S rRNA gene was amplified (~250 bps, V4  
752 region), and Illumina sequencing libraries were prepared from the amplicons according  
753 to a previously published protocol and primers<sup>48</sup>. Libraries were further pooled together  
754 at equal molar ratios and sequenced on an Illumina HiSeq 2500 Rapid Flowcell as  
755 paired-end (2X175 bps) reads, along with 8 bps Index reads, following the  
756 manufacturer's protocol (Illumina, USA). Raw sequencing reads were filtered by  
757 Illumina HiSeq Control Software to generate Pass-Filter reads for further analysis.  
758 Different samples were de-multiplexed using the index reads. Amplicon sequencing  
759 variants (ASVs) were then inferred from the unmerged pair-end sequences using the  
760 DADA2 plugin within QIIME2 version 2018.6<sup>16,17</sup>. The forward reads were trimmed at  
761 165 bp and the reverse reads were trimmed at 140 bp. All other settings within DADA2  
762 were default. Taxonomy was assigned to the resulting ASVs with a naive Bayes  
763 classifier trained on the Greengenes database version 13.8<sup>18,19</sup>. Only the target region  
764 of the 16S rRNA gene was used to train the classifier. Rarefaction analysis was  
765 performed within QIIME2<sup>17</sup>.

766

### 767 ***ex vivo* screening of the drug library**

768 In an anaerobic chamber, a small (~100 µl) of an HD-1 glycerol stock was diluted  
769 in 1 ml of mGAM, then 20 µl of this solution was used to inoculate 3 ml of mGAM in  
770 culture tubes. Cultures were grown for 24 hours at 37 °C in an anaerobic chamber. After  
771 24 hours, 10 µL of each drug (the concentration of each molecule in the library is 10  
772 mM), or of a DMSO control were added to the growing microbial community. In addition,  
773 10 µL of each drug was also incubated similarly in a no-microbiome, mGAM control.

774 HD-1 / DMSO control pellets from several batches of the screen were analyzed using  
775 high-throughput 16S rRNA gene sequencing as described above to ensure the  
776 maintenance of a similarly diverse microbial composition. Experiments and controls  
777 were allowed to incubate under the same conditions for a second 24-hour period. After  
778 incubation, cultures were extracted with double volume of ethyl acetate and the organic  
779 phase was dried under vacuum using a rotary evaporator (Speed Vac). The dried  
780 extracts were suspended in 250  $\mu$ L MeOH, centrifuged at 15000 rpm for 5 min to  
781 remove any particulates, and analyzed using HPLC-MS (Agilent Single Quad, column:  
782 Poroshell 120 EC-C18 2.7 $\mu$ m 4.6 x 50mm, flow rate 0.8 ml/min, 0.1% formic acid in  
783 water (solvent A), 0.1% formic acid in acetonitrile (solvent B), gradient: 1 min, 0.5% B;  
784 1-20 min, 0.5%-100% B; 20-25 min, 100% B). If drugs were deemed positive for MDM  
785 in one or both of the two runs, they were analyzed a third time using both HPLC-MS and  
786 HR-HPLC-MS/MS (Agilent QTOF, column: Poroshell 120 EC-C18 2.7 $\mu$ m 2.1x100 mm,  
787 flow rate 0.25 ml/min, 0.1% formic acid in water (solvent A), 0.1% formic acid in  
788 acetonitrile (solvent B), gradient: 1 min, 0.5% B; 1-20 min, 0.5%-100% B; 25-30 min,  
789 100% B). For selected molecules, cultures were scaled up and metabolites were  
790 purified and their structures were elucidated using NMR (see below).

791

## 792 **Isolation and structural elucidation of selected metabolites**

793

794 1 ml of HD-1 glycerol stock was used to inoculate 100 ml mGAM medium and  
795 cultured for 24 hours at 37 °C in an anaerobic chamber. After 24 hours, 2 ml of 10 mM  
796 capecitabine, hydrocortisone or nicardapine solutions were added to the HD-1 culture  
797 and incubated for another 24 hours. After the second 24 hours, the cultures were

798 extracted with double the volume of ethyl acetate and the organic solvent layer was  
799 dried under vacuum in a rotary evaporator. The dried extract was then suspended in  
800 MeOH and partitioned by reversed phase flash column chromatography (Mega Bond  
801 Elut-C18 10g, Agilent Technology, USA) using the following mobile phase conditions:  
802 solvent A, water with 0.01% formic acid; solvent B acetonitrile with 0.01% formic acid,  
803 gradient, 100% A to 100% B in 20% increments. Fractions containing the metabolites of  
804 interest were identified by HPLC-MS, and reverse phase HPLC was used to purify each  
805 metabolite using a fraction collector (Agilent Single Quad, column Poroshell 120 EC-  
806 C18 2.7  $\mu$ m 4.6x100 mm, flow rate 0.8 ml/min, 0.1% formic acid in water (solvent A),  
807 0.1% formic acid in acetonitrile (solvent B), gradient: 1 min, 0.5% B; 1-30 min, 0.5%-  
808 100% B; 30-35 min, 100% B). The purified metabolites were subjected to NMR and HR-  
809 MS/MS analysis. Structural elucidation details of capecitabine, hydrocortisone, and  
810 nicardipine metabolites are detailed in **Supplementary Data 1**.

811

### 812 **MDM-Screen using a panel of representative isolates from the gut microbiome**

813 3 ml of pre-reduced medium (PYG, RCM, GAM, BHI or LB, depending on the  
814 isolate, incubated for 24 hours in the anaerobic chamber) was inoculated with the  
815 corresponding isolate's glycerol stock. Cultures were grown overnight at 37°C in an  
816 anaerobic chamber (70% N<sub>2</sub>, 25% CO<sub>2</sub>, 5% H<sub>2</sub>). 20  $\mu$ L of these seed cultures were  
817 inoculated into 3 ml of the same selected medium, and incubated at 37°C under the  
818 same anaerobic conditions for an additional 24 hours. After 24 hours, 10  $\mu$ L of the 10  
819 mM drug solution in DMSO, or of a DMSO control were added to the growing microbial  
820 culture and incubated for another 24 hours. In addition, 10  $\mu$ L of each drug were

821 incubated for 24 hours under the same conditions in a no-bacterium, medium-only  
822 control. After incubation, cultures were extracted with ethyl acetate and the organic  
823 phase was dried under vacuum in a rotary evaporator. Extracts were suspended in 250  
824  $\mu$ l of MeOH and analyzed using HPLC-MS as described above.

825

## 826 **TP and UP gene deletions in *E. coli* BW25113**

827 *E. coli* BW25113 mutants that harbor a replacement of *deoA* or *udp* with a  
828 kanamycin resistance gene were obtained from the Keio collection<sup>49</sup>. Since the  
829 kanamycin resistance gene is flanked by FLP recognition target sites, we decided to  
830 excise it and obtain in-frame deletion mutants. Plasmid pCP20, encoding the FLP  
831 recombinase, was transformed to each of the mutants by electroporation, and  
832 transformants were selected on Ampicillin at 30 °C for 16 hours. 10 transformants from  
833 each mutant were then picked in 10  $\mu$ l LB medium with no selection, and incubated at  
834 42 °C for 8 hours to cure them from the temperature-sensitive pCP20 plasmid. Each  
835 growing colony was then streaked on three plates (LB-ampicillin, LB-kanamycin, and LB  
836 with no selection). Mutants that could only grow on LB, but not on LB-ampicillin  
837 (confirming the loss of the pCP20 plasmid), nor on LB-kanamycin (confirming the  
838 excision of the kanamycin resistance gene) were confirmed to harbor the correct  
839 deletion using PCR and DNA sequencing. Primers *deoA*-Check-F: 5'-  
840 CGCATCCGGCAAAGCCGCCTCATACTCTTTTCCTCGGGAGGTTACCTTG-3',  
841 *deoA*-Check-R: 5'-  
842 CAAATTTAAATGATCAGATCAGTATACCGTTATTCGCTGATACGGCGATA-3', *udp*-  
843 Check-F: 5'-



844 CGCGTCGGCCTTCAGACAGGAGAAGAGAATTACAGCAGACGACGCGCCGC-3',  
845 and udp-Check-R: 5'-  
846 TGTCTTTTTGCTTCTTCTGACTAAACCGATTCACAGAGGAGTTGTATATG-3' were  
847 used in PCR experiments to confirm the deletion of the *deoA* or *upd* genes and the  
848 kanamycin resistance gene replacing them<sup>49</sup>. To construct the  $\Delta deoA/\Delta udp$  double  
849 knockout, the in-frame  $\Delta udp$  knockout obtained above was used as a starting point.  
850 Plasmid pKD46 expressing the  $\lambda$  Red recombinase was transformed to it using  
851 electroporation,<sup>50</sup> and transformants were selected on LB-Ampicillin at 30 °C for 16  
852 hours. One Ampicillin-resistant transformant was then cultured at 30 °C in 50 ml of LB-  
853 Ampicillin, with an added 50  $\mu$ l of 1 M L-arabinose to induce the expression of the  
854 recombinase. At an optical density of 0.4-0.6, electrocompetent cells were prepared  
855 from the growing culture by serial washes in ice cold 10% glycerol, and ~300 ng of a  
856 linear PCR product were transformed to it by electroporation. This PCR product was  
857 prepared by using the *deoA*-Check-F and *deoA*-Check-R primers on a template DNA  
858 prepared from the *deoA* mutant of the Keio library, in which a kanamycin resistance  
859 gene replaces *deoA*. After electroporation, transformants were selected on LB-  
860 kanamycin at 37 °C to induce the loss of the temperature sensitive pKD46 plasmid,  
861 cultured in LB-kanamycin overnight at 37 °C, and checked by PCR to confirm the  
862 correct recombination position. Finally, the kanamycin resistance gene was excised  
863 from the *deoA* locus by the FLP recombinase using the same strategy explained above,  
864 resulting in the final  $\Delta deoA/\Delta udp$  mutant.

865

866 **MDM-Screen of capecitabine using wild type and mutant *E. coli*.**

867 Wild type *E. coli* BW25113, and corresponding TP knockout ( $\Delta deoA$ ), UP  
868 knockout ( $\Delta udp$ ), and TP/UP double knockout ( $\Delta deoA/\Delta udp$ ) strains were cultured  
869 overnight in LB medium (aerobically, shaking at 37 °C, 50 ml each). Triplicates of 3 ml  
870 for each strain were incubated with 10  $\mu$ l of 10 mM capecitabine (in DMSO) for an  
871 additional 24 hours in an anaerobic chamber along with bacteria-only and media-only  
872 controls. Cultures were then extracted and analyzed as previously described, except for  
873 the addition of 20  $\mu$ L of 0.25 mg/ml of an internal standard (voriconazole) prior to the  
874 extraction.

875

#### 876 **MDM-Screen of other FPs using wild type and mutant *E. coli*.**

877 Wild type *E. coli* BW25113, and corresponding TP knockout ( $\Delta deoA$ ), UP  
878 knockout ( $\Delta udp$ ), and TP/UP double knockout ( $\Delta deoA/\Delta udp$ ) strains were cultured  
879 overnight in LB medium (aerobically, shaking at 37 °C, 50 ml each). Aliquots  
880 (100  $\mu$ l) of each strain were used to inoculate 3 ml of M9 medium, which were grown  
881 again overnight (aerobically, shaking at 37 °C). 10  $\mu$ l of 10 mM doxifluridine (in DMSO)  
882 or trifluridine (in methanol) were incubated with each culture for an additional 24 hours  
883 in an anaerobic chamber, along with bacteria-only and medium-only controls. Cultures  
884 were spun down and collected supernatants were lyophilized. The dried residues were  
885 then resuspended in 500  $\mu$ L methanol and analyzed by HPLC-MS (Agilent Single Quad;  
886 column: Poroshell 120 EC-C18 2.7 $\mu$ m 4.6 x 100mm; flow rate: 0.6 ml/min; solvent A:  
887 0.1% formic acid in water: solvent B: 0.1% formic acid in acetonitrile) and the following  
888 gradient: 1 min, 0.5% B; 1-20 min, 0.5%-35% B; 25-30 min, 35%-100% B; 30-35 min,  
889 100% B.

890

891 **Microbiome-dependent pharmacokinetic experiment**

892 All animal experiments were conducted according to USA Public Health Service  
893 Policy of Humane Care and Use of Laboratory Animals. All protocols were approved by  
894 the Institutional Animal Care and Use Committee, protocol 2087-16 (Princeton  
895 University). 8-10-weeks old (25-30 g) C57BL/6 mice were purchased from Jackson  
896 laboratories. 12 mice were treated with a commonly used cocktail of antibiotics (1 g/l of  
897 ampicillin, neomycin, metronidazole and 0.5 g/l vancomycin) in drinking water for 14  
898 days<sup>51</sup>. The antibiotic solution was supplemented with 5 g/l aspartame to make it more  
899 palatable<sup>52</sup>. During these two weeks, the gut microbiome composition was monitored by  
900 collecting feces from each mouse and performing molecular and microbiological  
901 analyses to make sure the microbiome is being cleared by the antibiotic treatment. On  
902 day 15, no antibiotics are administered for 24 hours (a washout period). On day 16,  
903 mice were separated into the two groups, 6 per group (3 males and 3 females). In group  
904 1, mice remained non-colonized. In group 2, mice were administered 200 µl of freshly  
905 thawed HD-1 glycerol stock using oral gavage. On day 17, the oral gavage was  
906 repeated the same way to ensure the colonization of the administered bacteria (fecal  
907 samples were collected on days 16 and 17 and cultured anaerobically to ensure  
908 colonization). On day 18, the pharmacokinetic experiment was performed by monitoring  
909 the fate of capecitabine in mouse blood and feces over time. A capecitabine dose  
910 equivalent to a single human dose and adjusted to the weight of the mice was  
911 administered by oral gavage (755 mg / kg, as a solution in 50 µl DMSO), then serial  
912 sampling of tail vein blood (by tail snipping), as well as fecal collection were performed

913 at these time points (zero, 20 min, 40 min, 60 min, 2 hours, and 4 hours). Blood for each  
914 time point (30  $\mu$ l) was collected using a 30  $\mu$ l capillary tube and bulb dispenser  
915 (Drummond Microcaps, Drummond Scientific), quickly dispensed in 60  $\mu$ l EDTA to  
916 prevent blood coagulation, and stored on ice for up to 4 hours and then frozen at -80 °C  
917 until further analysis. Feces were also collected at the same time points (even though  
918 defecation was left at will, we succeeded in collecting feces for most time points), stored  
919 on ice for up to 4 hours and then frozen in -80 °C until further analysis. After the 4-hour  
920 pharmacokinetic time point, mice were euthanized.

921 For chemical extraction, 2  $\mu$ l of an internal standard solution (0.5 mg / ml of  
922 voriconazole) were added to the blood / EDTA solution mentioned above, and the  
923 sample was mixed using a vortex mixer. Next, 500  $\mu$ l of ethyl acetate was added and  
924 mixed. The sample was then centrifuged briefly at 15000 rpm, and the organic layer  
925 was transferred to a glass tube and evaporated under vacuum using rotary evaporation  
926 (Speed Vac). The dried residue was dissolved in 100  $\mu$ l of MeOH, and the solution was  
927 centrifuged at 15000 rpm and transferred to an autosampler vial for HR-HPLC-MS  
928 analysis. For fecal samples, pellets were weighed (for later normalizations), and  
929 suspended in 500  $\mu$ l sterile Milli-Q water (Millipore Corporation, USA). 2  $\mu$ l of an internal  
930 standard solution (0.5 mg / ml of voriconazole) were added to the sample, and the  
931 mixtures were extracted with 500  $\mu$ l 1:1 ethyl acetate : MeOH. Fecal debris were then  
932 spun down and collected supernatants were dried under vacuum using a rotary  
933 evaporator (Speed Vac). The dried residues were suspended in 100  $\mu$ l MeOH. The final  
934 solutions were centrifuged at 15000 rpm and transferred to autosampler vials.

935           The prepared samples were analyzed by HR-HPLC-MS (Agilent QTOF).  
936   Chromatography separation was carried out on a Poroshell 120 EC-C18 2.7  $\mu\text{m}$  2.1 x  
937   100 mm column (Agilent, USA) with the gradient: 99.5% A, 0.5% B to 100% B in 20  
938   minutes and a flow rate of 0.25 ml/min, where A= 0.1% formic acid in water and B=  
939   0.1% formic acid in acetonitrile. A 10  $\mu\text{l}$  aliquot of the reconstituted extract was injected  
940   into the HR-HPLC-MS system, and the Area Under the Curve (AUC) was integrated for  
941   each metabolite and normalized by the internal standard's AUC. Peak identities were  
942   confirmed by accurate mass, and by comparison of chromatographic retention time and  
943   MS/MS spectra to those of authentic standards.

944

#### 945   ***in vitro* metabolism of capecitabine and deglycocapecitabine using human**

#### 946   **carboxylesterase 1**

947   Human Carboxylesterase 1 (CES1) was purchased from Sigma-Aldrich. Capecitabine  
948   or deglycocapecitabine (3.25  $\mu\text{l}$  of a 10 mM stock in DMSO) was added into CES (50  
949    $\mu\text{g}$ ) in 20 mM HEPES pH 7.4; in a total volume of 150  $\mu\text{L}$  and then incubated at 37  $^{\circ}\text{C}$ <sup>53</sup>.  
950   After 60 min, the reaction was quenched with 150  $\mu\text{L}$  of acetonitrile and placed on ice.  
951   The mixture was centrifuged for 3 min at 15000 rpm. The supernatant was dried under  
952   vacuum using rotary evaporation (Speed Vac). The dried residues were suspended in  
953   200  $\mu\text{L}$  MeOH. The final solutions were centrifuged at 15000 rpm and transferred to  
954   autosampler vials. The samples were analyzed by HPLC-MS (Agilent Single Quad  
955   6120) for metabolite formation (column: Poroshell 120 EC-C18 2.7 $\mu\text{m}$  4.6 x 50mm, flow  
956   rate 0.8 ml/min, 0.1% formic acid in water (solvent A), 0.1% formic acid in acetonitrile  
957   (solvent B), gradient: 1 min, 0.5% B; 1-30 min, 0.5%-100% B; 30-35 min, 100% B).

958

959 **Data availability**

960 All data reported in this study are included in this manuscript and accompanying  
961 Supplementary Information.

962

963 **Acknowledgments**

964 We would like to thank Wei Wang and the Lewis Sigler Institute sequencing core  
965 facility for assistance with high-throughput 16S rRNA gene amplicon sequencing,  
966 Matthew Cahn for assistance with sequencing data analysis, Joseph Koos, A. James  
967 Link, and Yuki Sugimoto for assistance with Mass Spectrometry, Riley Skeen-Gaar for  
968 assistance with statistical analysis, Joseph Sheehan and Zemer Gitai for assistance  
969 with obtaining the Keio library mutants, Laboratory Animal Resources at Princeton  
970 University for assistance with mouse studies, and members of the Donia lab for useful  
971 discussions. Funding for this project has been provided by an Innovation Award from  
972 the Department of Molecular Biology, Princeton University, and an NIH Director's New  
973 Innovator Award (ID: 1DP2AI124441), both to M.S.D. B.J. is funded by a New Jersey  
974 Commission on Cancer Research Pre-doctoral award (ID: DFHS18PPC056), and J.L is  
975 funded by a National Science Foundation Graduate Research Fellowship (ID:  
976 2017249408).

977

978 **Author contributions**

979 M.S.D., P.C., and B.J. designed the study. P.C., B.J., J.L., R.H., S.C. and M.S.D.  
980 performed experiments and analyzed the data. M.S.D., P.C., B.J., and J.L. wrote the  
981 manuscript.

982

### 983 **Competing financial interests**

984 The authors declare no competing financial interests.

985

### 986 **Supplementary Information**

987 Supplementary Tables, Supplementary Figures, and Supplementary Data are  
988 provided.

989

990

991

992

993

994

995

996

997

998

999

1000

1001

1002

## 1003 REFERENCES

- 1004
- 1005 1 Kimura, T. *et al.* Drug absorption from large intestine: physicochemical factors governing
- 1006 drug absorption. *Biol. Pharm. Bull.* **17**, 327-333 (1994).
- 1007 2 Li, H. & Jia, W. Cometabolism of microbes and host: implications for drug metabolism
- 1008 and drug-induced toxicity. *Clin. Pharmacol. Ther.* **94**, 574-581,
- 1009 doi:10.1038/clpt.2013.157 (2013).
- 1010 3 Falony, G. *et al.* Population-level analysis of gut microbiome variation. *Science* **352**, 560-
- 1011 564, doi:10.1126/science.aad3503 (2016).
- 1012 4 Clayton, T. A., Baker, D., Lindon, J. C., Everett, J. R. & Nicholson, J. K.
- 1013 Pharmacometabonomic identification of a significant host-microbiome metabolic
- 1014 interaction affecting human drug metabolism. *Proc. Natl. Acad. Sci. U S A* **106**, 14728-
- 1015 14733, doi:10.1073/pnas.0904489106 (2009).
- 1016 5 Iida, N. *et al.* Commensal bacteria control cancer response to therapy by modulating the
- 1017 tumor microenvironment. *Science* **342**, 967-970, doi:10.1126/science.1240527 (2013).
- 1018 6 Sivan, A. *et al.* Commensal *Bifidobacterium* promotes antitumor immunity and facilitates
- 1019 anti-PD-L1 efficacy. *Science* **350**, 1084-1089, doi:10.1126/science.aac4255 (2015).
- 1020 7 Vetizou, M. *et al.* Anticancer immunotherapy by CTLA-4 blockade relies on the gut
- 1021 microbiota. *Science* **350**, 1079-1084 (2015).
- 1022 8 Wallace, B. D. *et al.* Alleviating cancer drug toxicity by inhibiting a bacterial enzyme.
- 1023 *Science* **330**, 831-835, doi:10.1126/science.1191175 (2010).
- 1024 9 Meinel, W., Sczesny, S., Brigelius-Flohe, R., Blaut, M. & Glatt, H. Impact of gut microbiota
- 1025 on intestinal and hepatic levels of phase 2 xenobiotic-metabolizing enzymes in the rat.
- 1026 *Drug Metab. Dispos.* **37**, 1179-1186, doi:10.1124/dmd.108.025916 (2009).
- 1027 10 Qin, J. *et al.* A human gut microbial gene catalogue established by metagenomic
- 1028 sequencing. *Nature* **464**, 59-65, doi:10.1038/nature08821 (2010).
- 1029 11 Backhed, F., Ley, R. E., Sonnenburg, J. L., Peterson, D. A. & Gordon, J. I. Host-bacterial
- 1030 mutualism in the human intestine. *Science* **307**, 1915-1920,
- 1031 doi:10.1126/science.1104816 (2005).
- 1032 12 Ilett, K. F., Tee, L. B., Reeves, P. T. & Minchin, R. F. Metabolism of drugs and other
- 1033 xenobiotics in the gut lumen and wall. *Pharmacol. Ther.* **46**, 67-93 (1990).
- 1034 13 Scheline, R. R. Metabolism of foreign compounds by gastrointestinal microorganisms.
- 1035 *Pharmacol. Rev.* **25**, 451-523 (1973).
- 1036 14 Spanogiannopoulos, P., Bess, E. N., Carmody, R. N. & Turnbaugh, P. J. The microbial
- 1037 pharmacists within us: a metagenomic view of xenobiotic metabolism. *Nat. Rev.*
- 1038 *Microbiol.* **14**, 273-287, doi:10.1038/nrmicro.2016.17 (2016).
- 1039 15 Lloyd-Price, J. *et al.* Strains, functions and dynamics in the expanded Human
- 1040 Microbiome Project. *Nature* **550**, 61-66, doi:10.1038/nature23889 (2017).
- 1041 16 Callahan, B. J. *et al.* DADA2: High-resolution sample inference from Illumina amplicon
- 1042 data. *Nat. Methods* **13**, 581-583, doi:10.1038/nmeth.3869 (2016).
- 1043 17 Bolyen, E. *et al.* QIIME 2: Reproducible, interactive, scalable, and extensible microbiome
- 1044 data science. *PeerJ Preprints* **6**, e27295v27292, doi:10.7287/peerj.preprints.27295v2
- 1045 (2018).



- 1046 18 Bokulich, N. A. *et al.* Optimizing taxonomic classification of marker-gene amplicon  
1047 sequences with QIIME 2's q2-feature-classifier plugin. *Microbiome* **6**, 90,  
1048 doi:10.1186/s40168-018-0470-z (2018).
- 1049 19 McDonald, D. *et al.* An improved Greengenes taxonomy with explicit ranks for ecological  
1050 and evolutionary analyses of bacteria and archaea. *ISME J.* **6**, 610-618,  
1051 doi:10.1038/ismej.2011.139 (2012).
- 1052 20 Rettedal, E. A., Gumpert, H. & Sommer, M. O. Cultivation-based multiplex phenotyping  
1053 of human gut microbiota allows targeted recovery of previously uncultured bacteria.  
1054 *Nat. Commun.* **5**, 4714, doi:10.1038/ncomms5714 (2014).
- 1055 21 McDonald, D. *et al.* American Gut: an Open Platform for Citizen Science Microbiome  
1056 Research. *mSystems* **3**, doi:10.1128/mSystems.00031-18 (2018).
- 1057 22 Tramontano, M. *et al.* Nutritional preferences of human gut bacteria reveal their  
1058 metabolic idiosyncrasies. *Nat. Microbiol.* **3**, 514-522, doi:10.1038/s41564-018-0123-9  
1059 (2018).
- 1060 23 Maier, L. *et al.* Extensive impact of non-antibiotic drugs on human gut bacteria. *Nature*  
1061 **555**, 623-628, doi:10.1038/nature25979 (2018).
- 1062 24 Peppercorn, M. A. & Goldman, P. The role of intestinal bacteria in the metabolism of  
1063 salicylazosulfapyridine. *J. Pharmacol. Exp. Ther.* **181**, 555-562 (1972).
- 1064 25 Azadkhan, A. K., Truelove, S. C. & Aronson, J. K. The disposition and metabolism of  
1065 sulphasalazine (salicylazosulphapyridine) in man. *Br. J. Clin. Pharmacol.* **13**, 523-528  
1066 (1982).
- 1067 26 Kuroiwa, M., Inotsume, N., Iwaoku, R. & Nakano, M. Reduction of Dantrolene by Enteric  
1068 Bacteria. *YAKUGAKU ZASSHI* **105**, 770-774, doi:10.1248/yakushi1947.105.8\_770 (1985).
- 1069 27 Elmer, G. W. & Remmel, R. P. Role of the intestinal microflora in clonazepam  
1070 metabolism in the rat. *Xenobiotica* **14**, 829-840, doi:10.3109/00498258409151481  
1071 (1984).
- 1072 28 Meuldermans, W. *et al.* The metabolism and excretion of risperidone after oral  
1073 administration in rats and dogs. *Drug Metab. Dispos.* **22**, 129 (1994).
- 1074 29 Mannens, G. *et al.* Absorption, metabolism, and excretion of risperidone in humans.  
1075 *Drug Metab. Dispos.* **21**, 1134-1141 (1993).
- 1076 30 Fedorowski, T., Salen, G., Tint, G. S. & Mosbach, E. Transformation of chenodeoxycholic  
1077 acid and ursodeoxycholic acid by human intestinal bacteria. *Gastroenterology* **77**, 1068-  
1078 1073 (1979).
- 1079 31 Ridlon, J. M. *et al.* *Clostridium scindens*: a human gut microbe with a high potential to  
1080 convert glucocorticoids into androgens. *J. Lipid Res.* **54**, 2437-2449,  
1081 doi:10.1194/jlr.M038869 (2013).
- 1082 32 Devendran, S., Mendez-Garcia, C. & Ridlon, J. M. Identification and characterization of a  
1083 20beta-HSDH from the anaerobic gut bacterium *Butyricoccus desmolans* ATCC 43058.  
1084 *J. Lipid Res.* **58**, 916-925, doi:10.1194/jlr.M074914 (2017).
- 1085 33 Northfield, T. C. & McColl, I. Postprandial concentrations of free and conjugated bile  
1086 acids down the length of the normal human small intestine. *Gut* **14**, 513-518 (1973).
- 1087 34 Lamont, E. B. & Schilsky, R. L. The oral fluoropyrimidines in cancer chemotherapy. *Clin.*  
1088 *Cancer Res.* **5**, 2289-2296 (1999).

- 1089 35 Longley, D. B., Harkin, D. P. & Johnston, P. G. 5-fluorouracil: mechanisms of action and  
1090 clinical strategies. *Nat. Rev. Cancer* **3**, 330-338, doi:10.1038/nrc1074 (2003).
- 1091 36 Cleary, J. M. *et al.* A phase 1 study of the pharmacokinetics of nucleoside analog  
1092 trifluridine and thymidine phosphorylase inhibitor tipiracil (components of TAS-102) vs  
1093 trifluridine alone. *Invest. New Drugs* **35**, 189-197, doi:10.1007/s10637-016-0409-9  
1094 (2017).
- 1095 37 Zampino, M. G. *et al.* Pharmacokinetics of oral doxifluridine in patients with colorectal  
1096 cancer. *Tumori* **85**, 47-50 (1999).
- 1097 38 Nakayama, H. *et al.* Intestinal anaerobic bacteria hydrolyse sorivudine, producing the  
1098 high blood concentration of 5-(E)-(2-bromovinyl)uracil that increases the level and  
1099 toxicity of 5-fluorouracil. *Pharmacogenetics* **7**, 35-43 (1997).
- 1100 39 Temmink, O. H. *et al.* Activity and substrate specificity of pyrimidine phosphorylases and  
1101 their role in fluoropyrimidine sensitivity in colon cancer cell lines. *Int. J. Biochem. Cell*  
1102 *Biol.* **39**, 565-575, doi:10.1016/j.biocel.2006.10.009 (2007).
- 1103 40 Lenz, H. J., Stintzing, S. & Loupakis, F. TAS-102, a novel antitumor agent: a review of the  
1104 mechanism of action. *Cancer Treat. Rev.* **41**, 777-783, doi:10.1016/j.ctrv.2015.06.001  
1105 (2015).
- 1106 41 Kim, N. K. *et al.* Intravenous 5-Fluorouracil Versus Oral Doxifluridine as Preoperative  
1107 Concurrent Chemoradiation for Locally Advanced Rectal Cancer: Prospective  
1108 Randomized Trials. *Jpn. J. Clin. Oncol.* **31**, 25-29, doi:10.1093/jjco/hye009 (2001).
- 1109 42 Min, J. S., Kim, N. K., Park, J. K., Yun, S. H. & Noh, J. K. A prospective randomized trial  
1110 comparing intravenous 5-fluorouracil and oral doxifluridine as postoperative adjuvant  
1111 treatment for advanced rectal cancer. *Ann. Surg. Oncol.* **7**, 674-679 (2000).
- 1112 43 Reigner, B., Blesch, K. & Weidekamm, E. Clinical pharmacokinetics of capecitabine. *Clin.*  
1113 *Pharmacokinet.* **40**, 85-104, doi:10.2165/00003088-200140020-00002 (2001).
- 1114 44 Tabata, T., Katoh, M., Tokudome, S., Nakajima, M. & Yokoi, T. Identification of the  
1115 cytosolic carboxylesterase catalyzing the 5'-deoxy-5-fluorocytidine formation from  
1116 capecitabine in human liver. *Drug Metab. Dispos.* **32**, 1103-1110,  
1117 doi:10.1124/dmd.104.000554 (2004).
- 1118 45 Quinney, S. K. *et al.* Hydrolysis of capecitabine to 5'-deoxy-5-fluorocytidine by human  
1119 carboxylesterases and inhibition by loperamide. *J. Pharmacol. Exp. Ther.* **313**, 1011-  
1120 1016, doi:10.1124/jpet.104.081265 (2005).
- 1121 46 Haiser, H. J. *et al.* Predicting and manipulating cardiac drug inactivation by the human  
1122 gut bacterium *Eggerthella lenta*. *Science* **341**, 295-298, doi:10.1126/science.1235872  
1123 (2013).
- 1124 47 Goodman, A. L. *et al.* Extensive personal human gut microbiota culture collections  
1125 characterized and manipulated in gnotobiotic mice. *Proc. Natl. Acad. Sci. U S A* **108**,  
1126 6252-6257, doi:10.1073/pnas.1102938108 (2011).
- 1127 48 Caporaso, J. G. *et al.* Ultra-high-throughput microbial community analysis on the  
1128 Illumina HiSeq and MiSeq platforms. *ISME J.* **6**, 1621-1624, doi:10.1038/ismej.2012.8  
1129 (2012).
- 1130 49 Baba, T. *et al.* Construction of *Escherichia coli* K-12 in-frame, single-gene knockout  
1131 mutants: the Keio collection. *Mol. Syst. Biol.* **2**, 2006 0008, doi:10.1038/msb4100050  
1132 (2006).

- 1133 50 Datsenko, K. A. & Wanner, B. L. One-step inactivation of chromosomal genes in  
1134 *Escherichia coli* K-12 using PCR products. *Proc. Natl. Acad. Sci. U S A* **97**, 6640-6645,  
1135 doi:10.1073/pnas.120163297 (2000).
- 1136 51 Planer, J. D. *et al.* Development of the gut microbiota and mucosal IgA responses in  
1137 twins and gnotobiotic mice. *Nature* **534**, 263-266, doi:10.1038/nature17940 (2016).
- 1138 52 Karmarkar, D. & Rock, K. L. Microbiota signalling through MyD88 is necessary for a  
1139 systemic neutrophilic inflammatory response. *Immunology* **140**, 483-492,  
1140 doi:10.1111/imm.12159 (2013).
- 1141 53 Hatfield, M. J. *et al.* Biochemical and molecular analysis of carboxylesterase-mediated  
1142 hydrolysis of cocaine and heroin. *Br. J. Pharmacol.* **160**, 1916-1928, doi:10.1111/j.1476-  
1143 5381.2010.00700.x (2010).
- 1144
